# Supplementary material
Source: Springer Nature journal article supplement (https://www.springermedizin.de/resource/supplementary/12885_2013_4681_MOESM1_ESM.pdf/9467068)

(a) Pretreatment

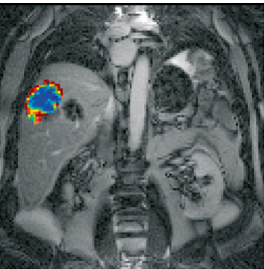

(b) Day 2

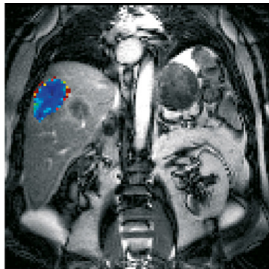

(c) Day 28

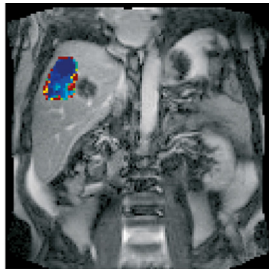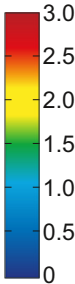

Supplement: MOESM1 [file 9467068]
